# Supplementary material for: Interventions against Social Isolation of Older Adults: A Systematic Review of Existing Literature and Interventions
Source: MDPI journal article supplement (doi:10.3390/geriatrics6030082), 2021-08-25
Supplement: s1 [file s1]

**Supplemental Table 1.** Study intervention demographics. \*

| <b>Intervention</b>                                              | <b>Location of Study</b>                  | <b>Study Length</b>             | <b>Sample</b>                                                                                                                       |
|------------------------------------------------------------------|-------------------------------------------|---------------------------------|-------------------------------------------------------------------------------------------------------------------------------------|
| <b>Volunteering</b>                                              |                                           |                                 |                                                                                                                                     |
| [14]                                                             | Chile, Mexico and Spain                   | 1994–1998, 2005–2009, 2010–2014 | $n = 1,699$ , ages 61–80                                                                                                            |
| [15]                                                             | Swedish National Prescribed Drug Register | 2010, 2012, 2014                | $n = 531$ , no volunteering<br>1) $n = 220$ , discontinuous volunteering<br>2) $n = 250$ , continuous volunteering                  |
| <b>Group Interventions</b>                                       |                                           |                                 |                                                                                                                                     |
| [16]                                                             | Chicago                                   | 3 months                        | $n = 26$ , network-building visiting program<br>1) $n = 26$ , relationship-oriented visiting program<br>2) $n = 13$ , control group |
| [17]                                                             | Canada                                    | 20 weeks                        | $n = 28$ , widowed older adults, age >55, 4 face to face support groups                                                             |
| <b>Psychosocial Group Intervention</b><br>[18]                   | Finland                                   | 3 months                        | $n = 117$ , 3 groups: art and inspiring activities, group exercise and discussions, therapeutic writing and group therapy           |
| <b>Community-Based Approach</b><br>[19]                          | Las Vegas, Nevada and Rural Clark County  | 4 months                        | $n = 339$                                                                                                                           |
| <b>Community Approach</b><br>[20]                                | Sweden                                    | 1 year                          | $n = 416$ , ages 70+<br>1) $n = 227$ : intervention group<br>2) $n = 189$ : control group                                           |
| <b>Social Activation Program</b><br>[21]                         | Stockholm, Sweden                         |                                 | $n = 60$<br>1) $n = 30$ : experimental group<br>2) $n = 30$ : control group                                                         |
| <b>Psychosocial Group Intervention</b><br>[22]                   | Japan                                     | 6 weeks                         | $n = 50$ , age < 65<br>1) $n = 25$ : experimental<br>2) $n = 25$ control                                                            |
| <b>Cognitive Enhancement Program, Group Intervention</b><br>[23] | USA                                       | 3 months                        | $n = 58$ , ages 61–98 years old<br>1) $n = 29$ : experimental group<br>2) $n = 29$ : control                                        |
| <b>Intervention Program</b><br>[10]                              | Sweden                                    | 24 weeks                        | $n = 65$ (random allocation to experimental and control groups)                                                                     |
| <b>Social Isolation Prevention Program</b><br>[12]               | Tokyo, Japan                              | 6 months                        | $n = 63$<br>1) $n = 21$ : intervention group<br>2) $n = 42$ : control group                                                         |
| <b>Friendship-Centered Interventions</b>                         |                                           |                                 |                                                                                                                                     |
| <b>Friendship Clubs</b><br>[24]                                  | UK                                        | 3 years                         | $n = 100$                                                                                                                           |
| <b>Individual Friendship Enrichment Program</b><br>[25]          | Dutch                                     | 6 weeks                         | $n = 239$                                                                                                                           |
| <b>Person Centered/One-on-One Intervention</b>                   |                                           |                                 |                                                                                                                                     |

|                                                                                                               |                             |                                                               |                                                                                             |
|---------------------------------------------------------------------------------------------------------------|-----------------------------|---------------------------------------------------------------|---------------------------------------------------------------------------------------------|
| [13]                                                                                                          | Louisville, KY,<br>USA      |                                                               | <i>n</i> = 65, ages 51–90                                                                   |
| <b>Peer Telephone Dyads</b><br>[26]                                                                           | USA                         | 10 weeks of staff<br>telephone calls then<br>pairing in dyads | <i>n</i> = 265                                                                              |
| <b>Individual Visits</b><br>[11]                                                                              | Southern Ontario,<br>Canada | 6 weeks                                                       | <i>n</i> = 26                                                                               |
| <b>One-on-One Visits</b><br>[27]                                                                              | The Netherlands             | 3 years                                                       | <i>n</i> = 580<br>1) <i>n</i> = 292: experimental group<br>2) <i>n</i> = 288: control group |
| <b>Health-Promoting/Social Support<br/>Interventions</b>                                                      |                             |                                                               |                                                                                             |
| <b>Health-Promoting Interventions</b><br>[28]                                                                 | Tehran, Iran                | 12 months                                                     | <i>n</i> = 464<br>1) <i>n</i> = 232: control group<br>2) <i>n</i> = 232: experimental group |
| <b>PRISM System: A Specially<br/>Designed Computer System for<br/>Older Adults (Randomized Trial)</b><br>[29] | USA                         | Collection at 6 and<br>12 months                              | <i>n</i> = 300                                                                              |

\*Same reference as the main text.
